# Supplementary material for: Postural stability disorders—early signs of aging—in physically non-active prisoners
Source: PeerJ. 2022 Jan 10;10:e12489. doi: 10.7717/peerj.12489 (PMC8757370; doi:10.7717/peerj.12489)
Supplement: Supplemental Information 1 [file peerj-10-12489-s001.xlsx]

## Sheet: Arkusz1
	LP.	date of birth	age	height	bmi	MASS	SP-EO [mm]	SPAP-EO [mm]	SPML-EO [mm]	MA-EO [mm]	MAAP-EO [mm]	MAML-EO [mm]	MaxAP-EO [mm]	MaxML-EO [mm]	MV-EO [mm/s]	MVAP-EO [mm/s]	MVML-EO [mm/s]	SA-EO [mm^2]	SPSA-EO [1/dmm]	MF-EO [Hz]	TR-EO R=5mm [%]	LWAP-EO	LWML-EO	MNDB-EO	MDDB-EO	MinDB-EO	MaxDB-EO	SP-EC [mm]	SPAP-EC [mm]	SPML-EC [mm]	MA-EC [mm]	MAAP-EC [mm]	MAML-EC [mm]	MaxAP-EC [mm]	MaxML-EC [mm]	MV-EC [mm/s]	MVAP-EC [mm/s]	MVML-EC [mm/s]	SA-EC [mm^2]	SPSA-EC [1/dmm]	MF-EC [Hz]	TR-EC R=5mm [%]	LWAP-EC	LWML-EC	MNDB-EC	MDDB-EC	MinDB-EC	MaxDB-EC	MaxAPF-EC
1	1	1986	29	183	23.1121	77.4	142	95	86	1.9	1.4	1	4.3	2.7	4.7	3.2	2.9	89	1.6	0.4	100	3	5	-2	-2	-5	0	243	194	107	3.2	3.1	0.7	8.3	2.4	8.1	6.5	3.6	191	1.27	0.4	81.7	11	25	-11	-11	-13	-8	6
1	3	1977	38	164	24.8364	66.8	146	102	83	1.8	1.6	0.4	4.7	1.1	4.9	3.4	2.8	74	1.96	0.44	100	12	7	24	24	23	26	230	198	83	1.7	1.6	0.4	6.2	1.5	7.7	6.6	2.8	85	2.7	0.71	97.9	39	7	20	20	19	22	5
1	4	1984	31	174	23.2527	70.4	152	114	77	2.6	2.3	1.1	7	3.5	5.1	3.8	2.6	117	1.3	0.31	82.1	9	5	-4	-4	-9	0	197	159	86	1.7	1.6	0.4	5.8	1.4	6.6	5.3	2.9	82	2.4	0.63	98.4	15	25	-8	-7	-9	-6	6
1	5	1989	26	178	25.7228	81.5	174	141	76	2.7	2.6	0.4	8.3	2.3	5.8	4.7	2.5	106	1.64	0.34	91.3	11	21	1	1	0	4	153	114	79	1.4	1.2	0.4	4.1	1.4	5.1	3.8	2.6	55	2.77	0.59	100	17	11	-2	-2	-3	0	3
1	6	1980	35	185	25.6538	87.8	124	97	57	1.1	1	0.4	3.9	1.3	4.1	3.2	1.9	35	3.57	0.6	100	13	6	4	4	3	6	114	86	57	1.4	1.2	0.6	3.8	1.6	3.8	2.9	1.9	46	2.48	0.43	100	8	5	2	2	1	4	4
1	7	1986	29	172	19.9432	59	149	102	86	1.3	1.3	0.2	4.5	0.9	5	3.4	2.9	61	2.45	0.58	100	9	17	9	9	7	10	183	141	89	1.6	1.5	0.4	5	1.3	6.1	4.7	3	76	2.41	0.61	100	18	11	8	8	7	9	5
1	8	1987	28	182	24.5743	81.4	151	108	84	2.2	2.1	0.6	6	1.8	5	3.6	2.8	100	1.51	0.36	97.7	3	13	0	0	-2	2	219	178	97	1.4	1.3	0.4	3.7	1.7	7.3	5.9	3.2	82	2.68	0.85	100	26	36	-3	-3	-5	-2	4
1	9	1979	36	182	21.0723	69.8	206	163	97	1.9	1.7	0.5	5.5	2	6.9	5.4	3.2	91	2.27	0.59	97.4	29	28	4	4	2	6	270	233	97	4.8	4.8	0.5	11.2	2	9	7.8	3.2	239	1.13	0.3	51.7	7	26	-1	-1	-4	2	11
1	10	1987	28	175	19.5592	59.9	184	130	104	2.3	2.1	0.7	4.9	2.4	6.1	4.3	3.5	119	1.55	0.43	100	13	10	4	4	2	8	202	150	105	1.7	1.6	0.4	6.4	1.3	6.7	5	3.5	92	2.2	0.63	94.3	18	20	5	6	3	8	6
1	11	1989	26	178	26.0384	82.5	132	90	78	6.1	6	0.6	16.5	3.3	4.4	3	2.6	241	0.55	0.11	54.3	1	11	2	2	0	5	136	97	74	1.6	1.5	0.5	4.4	1.8	4.5	3.2	2.5	61	2.21	0.44	100	12	12	-1	-1	-3	0	4
1	12	1988	27	190	22.133	79.9	159	99	104	3.5	3.3	0.9	9.9	4	5.3	3.3	3.5	180	0.88	0.24	72	8	13	-1	-1	-6	4	178	134	91	1.8	1.7	0.4	6.9	1.8	5.9	4.5	3	85	2.1	0.53	95.4	17	18	-1	-1	-2	1	7
1	13	1979	36	175	22.3347	68.4	125	83	76	1.2	1.2	0.2	4.1	0.9	4.2	2.8	2.5	45	2.76	0.55	100	7	13	0	0	-1	2	141	101	78	0.8	0.7	0.1	3.8	0.6	4.7	3.4	2.6	30	4.69	0.99	100	22	15	-2	-2	-3	0	4
1	14	1974	41	176	23.9217	74.1	146	104	81	1.1	1	0.4	4.1	1.4	4.9	3.5	2.7	47	3.1	0.7	100	21	16	-4	-4	-6	-2	227	180	104	2.5	2.4	0.5	10.1	5.3	7.6	6	3.5	134	1.69	0.48	92	14	28	-3	-3	-7	3	6
1	16	1974	41	180	21.5432	69.8	191	148	91	2.2	1.9	0.8	9.5	2.3	6.4	4.9	3	109	1.75	0.47	97.3	19	9	0	0	-2	3	199	143	108	2.2	2.1	0.4	8.5	1.8	6.6	4.8	3.6	120	1.66	0.48	92.7	14	20	-6	-6	-9	-5	8
1	17	1972	43	184	27.2921	92.4	151	115	77	2.3	2.1	0.7	6.1	3.2	5	3.8	2.6	99	1.53	0.35	94.4	14	15	3	4	1	6	213	184	75	2.5	2.3	0.5	10.2	2.2	7.1	6.1	2.5	107	1.99	0.45	90.4	15	15	3	3	1	4	10
1	18	1980	35	168	22.8529	64.5	166	121	89	1.3	1.2	0.3	11.4	3	5.5	4	3	76	2.17	0.67	98	19	17	0	0	-5	3	186	145	88	1.3	1.2	0.3	4	1.4	6.2	4.8	2.9	65	2.87	0.78	100	29	17	0	0	-1	1	4
1	20	1975	40	186	33.2119	114.9	159	136	60	2.1	2	0.4	7.9	1.3	5.3	4.5	2	72	2.22	0.41	95.7	7	4	10	10	8	11	171	147	62	2.9	2.7	0.8	7.6	1.6	5.7	4.9	2.1	109	1.57	0.31	87.8	12	3	7	7	6	8	8
1	22	1986	29	178	26.1331	82.8	132	74	93	0.6	0.6	0.2	2	1.1	4.4	2.5	3.1	29	4.55	1.1	100	17	22	-1	-1	-1	1	112	78	63	1	0.9	0.3	3.5	0.8	3.7	2.6	2.1	31	3.61	0.62	100	18	10	0	0	-1	1	3
1	23	1984	31	178	27.4587	87	127	95	66	0.9	0.8	0.3	3.8	1	4.2	3.2	2.2	33	3.87	0.72	100	18	11	0	0	-1	0	235	207	78	1.7	1.6	0.3	8.9	3.2	7.8	6.9	2.6	93	2.54	0.74	95.8	27	17	0	0	-2	1	4
1	24	1981	34	187	25.2795	88.4	216	162	104	4.2	4	0.9	25.3	3.7	7.2	5.4	3.5	265	0.82	0.27	68.5	7	15	5	5	1	8	202	156	97	1.9	1.7	0.5	7.5	2.2	6.7	5.2	3.2	101	2	0.57	97.9	16	25	-2	-2	-5	0	6
1	25	1978	37	178	23.04	73	156	105	93	1.2	1.1	0.3	4.8	1.2	5.2	3.5	3.1	56	2.81	0.72	100	13	29	12	12	10	13	182	136	93	3.6	3.6	0.4	8.7	3.1	6.1	4.5	3.1	173	1.05	0.27	84.5	3	15	9	9	5	10	5
1	28	1983	32	182	24.3026	80.5	146	93	93	1.7	1.5	0.4	4	2.5	4.9	3.1	3.1	75	1.94	0.46	100	9	30	15	15	13	17	147	104	83	2.2	2.2	0.4	5.3	2	4.9	3.5	2.8	97	1.52	0.35	98.1	7	20	10	10	8	11	5
1	29	1987	28	187	29.7978	104.2	154	115	78	2.3	1.9	1	6.9	4	5.1	3.8	2.6	102	1.5	0.36	90.2	18	14	-7	-7	-10	-3	222	190	83	3.3	3.1	0.8	9.6	6.7	7.4	6.3	2.8	172	1.3	0.35	80.4	16	20	-10	-10	-17	-6	8
1	30	1968	47	186	21.7944	75.4	164	119	89	1.7	1.4	0.8	5	3	5.5	4	3	84	1.96	0.51	99.9	15	7	6	6	3	9	276	238	99	2.3	2.1	0.6	8.1	3.3	9.2	7.9	3.3	137	2.02	0.65	93.5	21	23	6	6	4	10	8
1	31	1966	49	180	27.9321	90.5	165	131	76	7.9	7.8	1.2	12.3	2.8	5.5	4.4	2.5	312	0.53	0.11	8.6	1	2	-3	-3	-7	0	199	171	74	1.8	1.7	0.4	6	1.3	6.6	5.7	2.5	74	2.69	0.58	97.4	25	17	-7	-7	-8	-5	5
1	32	1989	26	170	18.8581	54.5	164	99	109	4.4	4.1	1.5	6.7	3.1	5.5	3.3	3.6	236	0.69	0.2	66.7	1	1	8	9	4	12	170	107	109	1.6	1.5	0.4	4.2	1.5	5.7	3.6	3.6	90	1.89	0.56	100	11	22	13	12	11	14	4
1	33	1974	41	182	23.3064	77.2	144	110	71	1.2	1.1	0.3	4	1	4.8	3.7	2.4	46	3.13	0.63	100	16	7	7	7	6	8	167	137	71	1.4	1.4	0.3	5.1	0.8	5.6	4.6	2.4	57	2.94	0.62	99.8	19	17	9	8	8	10	4
1	34	1969	46	180	21.0494	68.2	183	134	98	3	2	1.8	7.3	5.5	6.1	4.5	3.3	162	1.13	0.33	88.5	11	3	-6	-6	-10	1	166	114	96	1.7	1.6	0.4	4.3	1.3	5.5	3.8	3.2	81	2.05	0.53	100	10	9	-5	-5	-6	-3	4
1	35	1968	47	175	20.3429	62.3	183	125	107	4.7	4.5	1.1	13	3.6	6.1	4.2	3.6	261	0.7	0.21	56.8	9	9	-1	-1	-3	2	187	145	89	1.7	1.6	0.4	6.9	1.5	6.2	4.8	3	85	2.19	0.57	97	13	17	-4	-4	-5	-2	7
1	36	1985	30	179	23.2515	74.5	149	112	76	3	2.9	0.5	7	2.1	5	3.7	2.5	118	1.27	0.27	85.3	9	12	-6	-6	-9	-5	143	105	76	1.2	0.9	0.7	3	1.6	4.8	3.5	2.5	54	2.68	0.64	100	26	7	-6	-6	-8	-4	3
1	37	1988	27	179	25.9043	83	117	83	65	1.9	1.6	0.9	4.3	2.5	3.9	2.8	2.2	71	1.64	0.32	100	10	1	-1	-1	-4	1	110	74	65	1.3	1.3	0.2	4.4	0.7	3.7	2.5	2.2	43	2.54	0.44	100	6	8	-1	-1	-2	0	3
1	39	1975	40	182	24.2422	80.3	126	91	69	2.1	1.9	0.7	6.7	1.8	4.2	3	2.3	80	1.59	0.32	97	9	3	-6	-6	-9	-3	205	175	75	3.3	3.2	0.3	14.4	2.1	6.8	5.8	2.5	136	1.51	0.33	78.8	5	15	-1	-1	-5	0	14
1	40	1960	55	172	19.8418	58.7	155	93	103	2.1	2.1	0.4	5	1.6	5.2	3.1	3.4	110	1.4	0.38	99.9	1	16	5	5	3	6	146	107	78	1	0.9	0.2	3.5	0.8	4.9	3.6	2.6	42	3.46	0.8	100	19	15	6	6	5	7	3
1	41	1975	40	170	22.2837	64.4	207	161	98	1.7	1.5	0.5	6.5	1.6	6.9	5.4	3.3	92	2.25	0.66	98.7	19	12	-6	-6	-8	-5	191	142	99	1.3	1.2	0.3	3.8	1.2	6.4	4.7	3.3	67	2.86	0.81	100	22	24	-8	-8	-9	-7	3
1	42	1988	27	164	23.5351	63.3	148	88	99	2.2	2.1	0.4	5.6	1.6	4.9	2.9	3.3	105	1.41	0.36	93.5	7	7	11	12	9	13	204	153	102	1.3	1.2	0.3	5	1.2	6.8	5.1	3.4	69	2.96	0.82	100	18	29	14	14	13	15	4
1	43	1993	22	168	22.1443	62.5	149	104	83	4.9	4.8	0.6	16.8	1.9	5	3.5	2.8	200	0.74	0.16	70.9	3	11	5	5	3	7	155	112	84	1.9	1.9	0.4	6.2	1.3	5.2	3.7	2.8	84	1.84	0.42	97.6	9	19	5	5	3	6	6
1	44	1990	25	180	24.6914	80	106	71	64	1.6	1.6	0.2	3.7	0.6	3.5	2.4	2.1	52	2.06	0.35	100	6	8	4	4	4	5	158	125	74	1.5	1.4	0.3	4.5	1.3	5.3	4.2	2.5	57	2.79	0.57	100	22	23	9	9	8	10	4
1	45	1973	42	175	27.102	83	136	98	74	1.3	1.2	0.4	3.8	1.2	4.5	3.3	2.5	52	2.64	0.54	100	10	23	-9	-9	-10	-7	195	160	82	1.4	1	0.8	3.1	2.2	6.5	5.3	2.7	81	2.41	0.75	100	24	9	-7	-7	-9	-5	3
1	46	1962	53	179	27.4024	87.8	108	77	60	1.9	1.6	0.8	4.2	1.7	3.6	2.6	2	61	1.78	0.31	100	4	3	1	2	0	3	130	101	62	3.1	2.9	0.9	8.1	2.1	4.3	3.4	2.1	100	1.29	0.22	87	6	3	5	5	2	6	8
1	47	1975	40	184	25.2245	85.4	163	134	68	1.1	1	0.4	3.9	1.5	5.4	4.5	2.3	48	3.39	0.76	100	28	20	6	6	5	8	227	198	77	2.5	2.4	0.6	7.4	2.5	7.6	6.6	2.6	122	1.86	0.48	92.3	12	10	-3	-4	-5	1	7
1	48	1972	43	185	20.4529	70	156	114	82	1.8	1.7	0.6	7.4	2.3	5.2	3.8	2.7	83	1.89	0.45	97	3	6	10	10	7	13	281	243	98	1.5	1.4	0.5	5.4	2	9.4	8.1	3.3	96	2.94	0.97	99.1	37	25	12	12	11	14	5
1	49	1972	43	175	20.5061	62.8	197	149	102	1.6	1.4	0.4	5.4	1.9	6.6	5	3.4	86	2.3	0.67	98.9	18	25	-1	-1	-2	2	287	243	107	3.7	3.6	0.4	16.9	2	9.6	8.1	3.6	218	1.31	0.41	73.1	24	20	-4	-4	-6	-2	17
1	50	1973	42	177	28.5359	89.4	168	122	90	2.1	1.9	0.5	4.8	2.4	5.6	4.1	3	90	1.87	0.43	100	9	16	-12	-12	-14	-9	245	210	90	1.6	1.5	0.4	6.1	1.3	8.2	7	3	87	2.83	0.82	97.2	35	36	-11	-11	-13	-9	6
1	51	1983	32	173	23.1548	69.3	148	102	86	2.5	2.4	0.4	8	1.5	4.9	3.4	2.9	109	1.36	0.32	91.9	9	5	9	9	8	11	161	113	91	1.3	1.2	0.3	4.7	1.4	5.4	3.8	3	66	2.42	0.64	100	17	20	8	8	7	9	3
1	52	1987	28	190	35.2632	127.3	122	86	70	1.8	1.7	0.4	7.3	1.9	4.1	2.9	2.3	67	1.83	0.36	97.9	5	33	-2	-2	-3	0	134	101	69	1.3	1.2	0.4	4.8	1.4	4.5	3.4	2.3	52	2.58	0.53	100	15	25	-2	-2	-4	-1	5
1	53	1978	37	167	25.6015	71.4	152	112	80	1.5	1.3	0.6	4.2	2.1	5.1	3.7	2.7	64	2.38	0.52	100	17	15	7	7	4	9	150	116	72	1.3	1.2	0.3	4.4	1	5	3.9	2.4	50	3.02	0.61	100	18	19	7	7	5	9	4
1	55	1977	38	170	30.6228	88.5	217	182	86	3.3	3.2	0.6	10.9	2.4	7.2	6.1	2.9	156	1.39	0.34	78.2	16	23	-3	-2	-6	1	216	183	84	3.6	3.5	0.5	15.3	1.9	7.2	6.1	2.8	149	1.45	0.32	76.5	10	22	-2	-1	-7	1	15
1	56	1966	49	152	20.8189	48.1	199	149	101	1.8	1.7	0.3	6.1	1.1	6.6	5	3.4	95	2.1	0.6	98.3	22	17	8	8	6	10	342	299	115	2.5	2.3	0.4	13.2	1.4	11.4	10	3.8	161	2.13	0.74	90.1	36	42	6	6	4	8	8
1	57	1980	35	178	29.0999	92.2	148	112	75	1.6	1.5	0.4	4.2	1.4	4.9	3.7	2.5	62	2.38	0.5	100	13	25	11	11	9	12	184	154	74	2.5	2.4	0.4	7.6	1.3	6.1	5.1	2.5	90	2.04	0.39	90.1	14	13	11	11	10	13	8
1	59	1991	24	160	20	51.2	161	100	104	1.4	1.1	0.6	3.8	1.8	5.4	3.3	3.5	71	2.28	0.61	100	9	17	10	10	7	12	199	144	108	1.3	1.1	0.3	4.2	1.3	6.6	4.8	3.6	70	2.83	0.85	100	30	30	5	5	3	7	4
1	60	1986	29	177	20.9071	65.5	178	134	90	3.8	3.7	0.6	12.2	2.3	5.9	4.5	3	174	1.03	0.25	70.5	7	19	3	3	1	5	172	128	88	3.7	3.6	0.6	12.3	1.4	5.7	4.3	2.9	166	1.03	0.25	84.2	3	5	8	8	6	9	12
1	61	1973	42	173	20.2813	60.7	179	134	92	1.8	1.5	0.7	5.5	2	6	4.5	3.1	94	1.9	0.52	99.4	12	7	1	1	-1	4	187	146	88	2.4	2.3	0.4	7.6	1.6	6.2	4.9	2.9	108	1.73	0.42	87.4	19	11	-4	-4	-5	0	5
1	64	1974	41	186	30.0324	103.9	111	86	52	1.3	1.2	0.4	4.1	1.3	3.7	2.9	1.7	39	2.88	0.44	100	13	5	10	10	9	12	122	99	52	1.7	1.6	0.3	5.7	0.9	4.1	3.3	1.7	46	2.62	0.38	99.2	5	4	9	9	7	10	6
1	62	1991	24	182	24.2121	80.2	122	86	69	1.1	0.9	0.5	3.4	1.8	4.1	2.9	2.3	42	2.9	0.57	100	18	7	3	3	1	5	114	77	69	1	0.8	0.4	2.7	1.2	3.8	2.6	2.3	33	3.49	0.64	100	17	7	0	0	-1	1	3
1	63	1962	53	182	26.6574	88.3	159	130	69	3.3	3	1	10.7	2.7	5.3	4.3	2.3	141	1.13	0.26	84.3	11	3	6	6	2	9	234	209	73	2.9	2.6	1	8.5	3.2	7.8	7	2.4	169	1.38	0.42	86.5	22	3	1	1	-2	5	8
1	65	1988	27	176	22.7918	70.6	147	102	86	1.4	1.3	0.4	4.5	1.6	4.9	3.4	2.9	65	2.26	0.55	100	13	9	6	6	5	8	157	116	83	0.8	0.8	0.2	2.5	0.6	5.2	3.9	2.8	35	4.5	1.01	100	25	18	5	5	4	6	2
1	66	1968	47	183	24.6947	82.7	139	98	79	3.8	3.7	0.5	8.6	1.9	4.6	3.3	2.6	148	0.94	0.2	67.7	5	14	4	4	2	6	172	136	81	2.7	2.5	0.6	8.6	2.3	5.7	4.5	2.7	117	1.47	0.34	90.1	11	13	5	5	4	8	6
1	67	1977	38	178	33.8341	107.2	145	122	56	1.8	1.6	0.6	7.3	2	4.8	4.1	1.9	68	2.12	0.44	90	33	5	3	3	2	5	292	273	67	3.1	3	0.5	8.9	2.1	9.7	9.1	2.2	135	2.17	0.5	80.9	23	15	5	5	4	6	9
1	68	1979	36	185	26.092	89.3	168	129	82	4.3	4.3	0.5	10.4	2.6	5.6	4.3	2.7	183	0.92	0.21	68.2	1	13	5	5	2	9	193	159	79	2.8	2.8	0.3	10	1.9	6.4	5.3	2.6	123	1.57	0.36	84.2	13	34	5	5	4	7	10
1	69	1985	30	178	24.6181	78	123	69	86	1.6	1.6	0.2	5.2	1	4.1	2.3	2.9	61	2.01	0.41	99.3	5	22	-18	-18	-19	-17	135	99	72	0.7	0.6	0.2	2.4	1.1	4.5	3.3	2.4	27	5.05	1.06	100	24	13	-20	-20	-20	-19	2
1	70	1972	43	179	27.2151	87.2	120	79	73	1.1	1	0.4	5.8	1.7	4	2.6	2.4	41	2.95	0.57	99.2	15	8	14	13	12	15	140	103	73	2	1.9	0.5	9.4	2.4	4.7	3.4	2.4	76	1.85	0.37	93.6	6	3	15	15	14	17	9
1	71	1979	36	190	24.4598	88.3	129	94	69	2.1	1.9	0.8	7.7	3.1	4.3	3.1	2.3	81	1.59	0.32	90.8	9	5	-1	-1	-5	1	176	147	72	1.5	1.4	0.3	6.5	2.4	5.9	4.9	2.4	62	2.86	0.64	97	24	16	1	1	-1	2	6
1	74	1988	27	175	24.1633	74	199	155	94	2.4	2.3	0.5	5.8	2.7	6.6	5.2	3.1	130	1.53	0.43	96.6	11	17	-1	0	-6	2	213	176	87	2.5	2.4	0.4	7.6	1.5	7.1	5.9	2.9	117	1.82	0.46	94.2	13	17	1	1	-1	3	8
1	75	1974	41	180	29.7222	96.3	167	134	74	7.8	7.8	0.6	14.8	2.5	5.6	4.5	2.5	290	0.58	0.11	22.8	1	13	-7	-7	-9	-4	190	158	78	2	1.8	0.6	6.8	2.9	6.3	5.3	2.6	95	1.99	0.51	97.5	23	22	-12	-12	-15	-9	4
1	76	1979	36	186	23.2108	80.3	127	92	68	1.5	1.4	0.3	4.3	1.6	4.2	3.1	2.3	55	2.3	0.44	100	6	7	-7	-7	-8	-4	183	158	66	1.2	1.1	0.3	4.7	1.4	6.1	5.3	2.2	45	4.07	0.8	100	39	5	1	1	0	3	5
1	77	1978	37	178	30.3623	96.2	96	68	53	3.5	3.5	0.4	7	1	3.2	2.3	1.8	98	0.98	0.14	80.5	1	8	0	0	-1	1	117	91	56	1.1	1	0.2	4.4	1.2	3.9	3	1.9	33	3.59	0.57	100	12	9	0	0	-1	1	4
1	78	1076	939	170	23.2526	67.2	215	174	93	4.4	4.3	0.4	15.6	1.9	7.2	5.8	3.1	210	1.03	0.26	64.4	4	17	-5	-5	-7	-1	254	216	94	2.5	2.4	0.3	9	1.4	8.5	7.2	3.1	127	2	0.55	91.6	17	28	-4	-4	-6	-2	7
1	79	1984	31	188	23.144	81.8	114	78	66	1.1	1	0.3	3.7	1.2	3.8	2.6	2.2	39	2.91	0.54	100	9	11	-11	-11	-12	-10	120	88	64	1.4	1.4	0.2	4.2	0.6	4	2.9	2.1	45	2.64	0.44	100	11	13	-11	-11	-12	-10	4
1	80	1984	31	168	25.3685	71.6	140	96	82	2.3	2.2	0.6	6.8	2	4.7	3.2	2.7	97	1.45	0.32	95.9	3	5	8	8	5	11	154	112	83	1.7	1.7	0.2	4.5	1.3	5.1	3.7	2.8	75	2.05	0.48	100	12	17	5	5	4	6	4
1	81	1988	27	178	25.4387	80.6	118	88	61	1.1	1	0.3	3.2	1.4	3.9	2.9	2	38	3.09	0.56	100	16	1	-6	-6	-7	-4	135	106	63	1.1	0.9	0.4	4.2	1.2	4.5	3.5	2.1	42	3.25	0.64	100	26	9	-7	-7	-8	-6	4
1	82	1991	24	175	22.0735	67.6	170	120	96	1.4	1.3	0.3	4.4	2.4	5.7	4	3.2	68	2.49	0.66	100	15	24	3	4	0	5	235	194	97	1.7	1.5	0.4	6.3	2.9	7.8	6.5	3.2	107	2.19	0.75	97.4	29	25	3	3	1	8	6
1	83	1982	33	178	20.7676	65.8	173	121	99	1.6	1.1	0.8	4.3	2.6	5.8	4	3.3	85	2.03	0.59	100	17	5	-16	-16	-19	-13	189	135	104	1.6	1.4	0.5	4.6	1.6	6.3	4.5	3.5	88	2.15	0.64	100	17	13	-16	-16	-18	-14	3
1	84	1989	26	173	24.6918	73.9	141	95	84	1.8	1.6	0.6	9.5	2.2	4.7	3.2	2.8	79	1.8	0.42	97.1	7	10	6	6	4	9	139	96	80	1	1	0.2	5.9	0.9	4.6	3.2	2.7	43	3.24	0.72	98.7	25	14	6	6	5	7	3
1	85	1991	24	180	22.7778	73.8	142	100	80	3.1	3.1	0.2	5.8	1.1	4.7	3.3	2.7	124	1.14	0.24	91.2	5	20	13	13	11	14	157	120	78	1.3	1.2	0.3	6.3	1.1	5.2	4	2.6	54	2.92	0.65	98.4	15	9	9	9	7	10	6
1	86	1978	37	173	30.1714	90.3	132	99	68	2	1.7	0.6	8.5	2.1	4.4	3.3	2.3	73	1.8	0.35	90	11	5	-4	-4	-6	-1	174	146	69	2.3	2.2	0.6	6.8	2.2	5.8	4.9	2.3	89	1.96	0.4	96.2	5	1	-4	-4	-5	-3	4
1	87	1985	30	172	27.3121	80.8	148	111	74	3.1	2.9	0.7	10.9	2.1	4.9	3.7	2.5	127	1.16	0.25	79.7	7	7	8	8	6	12	182	140	87	4.3	4.3	0.5	10.9	2.1	6.1	4.7	2.9	196	0.93	0.22	63.5	4	17	-2	-3	-5	1	11
1	88	1977	38	190	26.482	95.6	246	219	76	5.1	4.9	1	17.4	4.3	8.2	7.3	2.5	210	1.17	0.26	65.4	1	13	0	0	-2	5	365	343	79	2.7	2.7	0.3	8.3	1.4	12.2	11.4	2.6	115	3.17	0.71	86.8	30	28	0	0	-2	2	8
1	89	1969	46	180	31.2963	101.4	131	100	65	0.9	0.7	0.4	2.4	1.5	4.4	3.3	2.2	37	3.55	0.75	100	22	7	-11	-11	-12	-9	170	142	69	2.3	2.2	0.5	6.8	1.4	5.7	4.7	2.3	86	1.98	0.39	95.2	9	14	-12	-12	-14	-11	5
1	90	1980	35	178	25.5018	80.8	156	111	86	1.7	1.4	0.6	6.2	5.1	5.2	3.7	2.9	99	1.58	0.5	97.5	16	20	-7	-7	-14	-4	187	155	77	1.4	1.2	0.5	5.9	1.6	6.2	5.2	2.6	71	2.65	0.68	99	26	17	-11	-12	-13	-9	6
1	91	1983	32	174	20.9407	63.4	175	119	102	1.2	1.2	0.3	3.9	1	5.8	4	3.4	65	2.7	0.74	100	17	18	-1	-1	-2	0	226	180	101	2	2	0.3	8.6	1.1	7.5	6	3.4	106	2.14	0.6	95.7	19	20	0	0	-1	1	5
1	93	1986	29	189	20.6881	73.9	183	141	89	2	1.8	0.6	8.5	2.3	6.1	4.7	3	100	1.83	0.49	95.5	12	22	-3	-3	-7	0	199	160	87	2.2	1.8	1	7.1	3.1	6.6	5.3	2.9	129	1.54	0.47	92.4	23	11	-2	-2	-7	1	6
1	92	1974	41	185	27.2023	93.1	138	98	76	3.2	3.1	0.5	8.8	1.7	4.6	3.3	2.5	121	1.13	0.23	81.4	4	5	-4	-3	-5	-2	169	138	71	1.4	1.3	0.4	5.6	1.3	5.6	4.6	2.4	62	2.74	0.63	99.2	19	7	-4	-4	-5	-2	5
1	94	1988	27	178	25.4071	80.5	109	66	72	1.3	1.3	0.2	3.7	0.6	3.6	2.2	2.4	47	2.3	0.43	100	9	12	4	4	3	4	162	127	77	1.2	1.2	0.2	3.1	0.8	5.4	4.2	2.6	47	3.45	0.71	100	21	16	2	2	1	3	3
1	95	1971	44	183	26.0981	87.4	160	128	71	1.8	1.5	0.8	5.4	2	5.3	4.3	2.4	79	2.04	0.48	99.5	14	5	4	4	2	6	255	226	80	2.2	2.1	0.4	10.1	2	8.5	7.5	2.7	115	2.22	0.62	93.1	17	15	0	0	-2	1	6
1	96	1981	34	172	29.9486	88.6	172	130	87	1.5	1.2	0.7	5	2.5	5.7	4.3	2.9	76	2.27	0.61	99.9	24	22	13	13	10	15	369	293	166	4	3.3	1.6	22.1	9.1	12.3	9.8	5.5	403	0.92	0.49	78.3	23	22	7	6	-4	19	22
1	97	1971	44	173	29.2693	87.6	137	100	72	1.7	1.6	0.4	5.1	1.2	4.6	3.3	2.4	63	2.17	0.42	99.5	14	16	-4	-4	-6	-2	156	121	76	2.5	2.2	0.9	8.1	2.4	5.2	4	2.5	107	1.46	0.33	89.1	14	11	-5	-5	-7	-3	8
1	98	1980	35	173	24.6584	73.8	147	104	83	1.4	1.4	0.2	6.4	1.1	4.9	3.5	2.8	59	2.48	0.56	97.2	15	32	4	4	3	5	174	137	82	1.5	1.5	0.2	3.8	0.7	5.8	4.6	2.7	64	2.7	0.6	100	21	24	4	4	3	4	4
1	99	1972	43	172	27.2783	80.7	157	121	75	1.6	1.5	0.3	4.6	1	5.2	4	2.5	61	2.55	0.54	100	18	13	4	4	3	5	0	0	0	0	0	0	0	0	0	0	0	0	0	0	0	0	0	0	0	0	0	0
1	101	1978	37	176	21.436	66.4	180	129	99	4	3.6	1.3	11.7	3.6	6	4.3	3.3	221	0.81	0.24	80.1	2	3	3	2	-3	8	0	0	0	0	0	0	0	0	0	0	0	0	0	0	0	0	0	0	0	0	0	0
1	102	1987	28	178	24.2078	76.7	141	90	89	2.4	1.8	1.3	6.4	3.3	4.7	3	3	108	1.3	0.31	92.9	12	9	-2	-2	-5	2	160	111	92	4.7	4.5	0.7	8.7	2.1	5.3	3.7	3.1	214	0.75	0.18	52.8	3	21	-6	-6	-9	-3	9
1	103	1977	38	178	21.1148	66.9	177	135	89	2.4	2.3	0.4	6.5	1.8	5.9	4.5	3	108	1.64	0.39	96	7	23	7	7	5	10	188	148	88	1.8	1.7	0.4	4.8	2.1	6.3	4.9	2.9	86	2.19	0.55	100	20	19	7	7	6	10	5
1	105	1980	35	180	22.5	72.9	132	87	81	1	0.9	0.3	3.7	1.1	4.4	2.9	2.7	42	3.15	0.72	100	24	20	4	4	3	5	178	142	78	1.2	1.1	0.3	4.7	1.4	5.9	4.7	2.6	56	3.15	0.78	100	30	13	3	3	2	4	4
1	106	1985	30	187	22.7344	79.5	181	149	76	3.6	3.5	0.6	7.9	1.7	6	5	2.5	135	1.34	0.27	77.7	9	5	9	9	7	13	335	299	103	2.7	2.6	0.4	8.9	1.7	11.2	10	3.4	161	2.08	0.65	89.1	26	40	5	5	3	8	6
1	107	1976	39	175	21.9429	67.2	177	125	99	2.3	2	0.8	6.7	2.7	5.9	4.2	3.3	114	1.55	0.41	93.8	10	9	9	9	6	12	190	147	92	1.4	1.4	0.3	6.3	1.4	6.3	4.9	3.1	68	2.79	0.7	98.9	14	25	7	7	5	8	6
1	108	1974	41	187	19.8461	69.4	192	138	106	2.3	2	0.8	6.1	3	6.4	4.6	3.5	125	1.54	0.45	96.1	12	15	16	15	14	18	201	152	100	1.6	1.5	0.4	5.4	1.7	6.7	5.1	3.3	84	2.4	0.67	99.4	25	32	12	12	11	13	5
1	109	1985	30	186	19.8578	68.7	154	118	75	1.8	1.8	0.3	8.1	1.8	5.1	3.9	2.5	73	2.13	0.45	93.4	9	7	3	3	1	5	247	204	100	1.4	1.3	0.3	8.6	1.2	8.2	6.8	3.3	81	3.05	0.96	98.1	34	23	2	2	0	3	9
1	110	1978	37	186	30.6394	106	275	245	86	2.8	2.5	0.8	11	2.5	9.2	8.2	2.9	158	1.74	0.53	89.6	24	14	-10	-10	-15	-7	462	425	121	5.4	5.1	1.2	13	3.3	15.4	14.2	4	439	1.05	0.45	48.9	24	17	-16	-15	-20	-11	13
1	111	1958	57	176	23.0501	71.4	145	97	87	1.8	1.7	0.5	4.9	1.4	4.8	3.2	2.9	80	1.81	0.42	100	10	9	6	6	5	6	138	95	80	1.2	1.1	0.3	4.9	1.1	4.6	3.2	2.7	52	2.64	0.59	100	9	13	5	4	4	5	3
1	112	1972	43	176	27.0209	83.7	138	103	71	1.7	1.5	0.5	4.1	1.9	4.6	3.4	2.4	64	2.14	0.44	100	15	12	17	17	15	18	140	106	70	2	1.9	0.5	8.2	1.8	4.7	3.5	2.3	78	1.8	0.37	97.2	7	13	16	16	15	18	8
1	113	1981	34	178	19.0317	60.3	208	150	111	2	1.6	0.9	8.8	3	6.9	5	3.7	132	1.58	0.55	97.9	18	17	6	6	3	10	290	223	144	4.5	4	1.3	16.4	6.3	9.7	7.4	4.8	352	0.83	0.34	66.3	15	26	5	5	-1	12	13
1	114	1964	51	170	21.4533	62	163	107	101	1	0.8	0.4	2.5	1.1	5.4	3.6	3.4	48	3.39	0.91	100	18	13	4	4	3	5	237	180	117	1.2	1	0.4	7	1.5	7.9	6	3.9	74	3.2	1.09	99.2	34	29	5	5	3	7	3
1	115	1986	29	169	21.6029	61.7	153	105	89	1.5	1.4	0.3	5.6	1.2	5.1	3.5	3	69	2.22	0.53	97.5	13	14	-4	-4	-6	-3	141	98	82	0.9	0.9	0.2	2.7	0.8	4.7	3.3	2.7	39	3.6	0.82	100	15	13	-5	-5	-6	-4	3
1	116	1979	36	164	26.9185	72.4	162	129	72	1.2	1.1	0.4	3.7	1.7	5.4	4.3	2.4	53	3.08	0.7	100	28	11	-3	-3	-5	-2	235	206	78	1.6	1.5	0.3	5.6	1.3	7.8	6.9	2.6	72	3.29	0.8	98.9	42	19	-4	-4	-6	-3	4
1	118	1980	35	175	29.7469	91.1	150	119	70	1.8	1.7	0.4	6.4	1.7	5	4	2.3	67	2.24	0.45	97.7	8	8	-2	-2	-3	1	213	185	75	2.7	2.4	0.8	8.2	2.5	7.1	6.2	2.5	136	1.57	0.42	90.1	22	7	3	4	0	5	8
1	120	1982	33	176	27.7634	86	114	74	71	0.8	0.7	0.3	3	0.9	3.8	2.5	2.4	28	4.05	0.79	100	16	9	7	7	6	8	126	86	73	0.8	0.7	0.2	3.5	0.6	4.2	2.9	2.4	29	4.39	0.87	100	19	29	7	7	6	7	2
1	121	1977	38	183	25.4113	85.1	134	94	75	1.7	1.1	1	3.5	3.8	4.5	3.1	2.5	75	1.8	0.42	100	19	9	0	2	-6	4	205	173	78	2.5	2.2	0.9	7.8	3.1	6.8	5.8	2.6	129	1.58	0.43	90.2	17	13	-1	-1	-4	2	8
1	122	1985	30	175	24.1633	74	183	135	94	1.7	1.6	0.4	7	2.1	6.1	4.5	3.1	96	1.9	0.57	98.5	15	32	-3	-3	-5	1	201	161	90	4.1	4	0.8	9.7	2.4	6.7	5.4	3	184	1.09	0.26	61.9	5	9	7	7	5	8	9
1	124	1965	50	186	22.8928	79.2	328	296	97	2.9	2.6	1	10.4	3.9	10.9	9.9	3.2	217	1.51	0.61	88.2	25	13	1	1	-2	6	1268	1219	233	6.3	4.8	3.1	20.5	11.4	42.3	40.6	7.8	2172	0.58	1.06	45	84	17	-6	-6	-18	4	19
1	125	1979	36	175	20.0163	61.3	153	89	104	2.3	2.2	0.3	4.3	1.4	5.1	3	3.5	122	1.26	0.36	100	3	8	0	1	-2	2	160	107	98	1.8	1.8	0.4	4.6	1.3	5.3	3.6	3.3	88	1.83	0.47	100	11	15	4	4	3	5	5
1	126	1986	29	186	22.7194	78.6	144	92	91	2.1	2	0.3	5.7	1.2	4.8	3.1	3	94	1.53	0.37	97.8	3	33	9	9	7	10	177	134	90	1.2	1	0.4	4	1.4	5.9	4.5	3	56	3.14	0.81	100	25	21	10	10	9	11	4
1	127	1993	22	179	21.1292	67.7	136	84	88	1.8	1.5	0.7	4.3	2.8	4.5	2.8	2.9	76	1.78	0.41	100	3	1	-9	-9	-11	-7	177	132	91	1.2	1.1	0.3	3.5	1.3	5.9	4.4	3	60	2.96	0.77	100	18	9	-11	-11	-13	-10	3
1	129	1983	32	170	25.0173	72.3	160	114	90	3.8	3.5	1.3	8	3.4	5.3	3.8	3	208	0.77	0.22	77.2	1	7	12	12	8	15	175	132	89	3	3	0.3	11.9	1.8	5.8	4.4	3	141	1.24	0.31	92.6	4	30	12	12	10	15	5
1	130	1962	53	179	21.3476	68.4	250	211	97	2.1	2	0.4	7.8	1.4	8.3	7	3.2	116	2.16	0.63	94.4	17	12	-4	-5	-6	-2	246	207	96	1.6	1.5	0.2	5.2	0.8	8.2	6.9	3.2	81	3.03	0.83	99.7	15	19	-6	-6	-7	-5	5
1	131	1980	35	177	26.6207	83.4	134	98	70	1.6	1	1	3.4	2.5	4.5	3.3	2.3	67	1.99	0.46	100	17	5	9	9	6	12	182	152	72	1.7	1.4	0.7	3.9	2.5	6.1	5.1	2.4	88	2.06	0.56	100	30	3	13	13	12	16	4
1	132	1991	24	180	26.2037	84.9	193	144	97	3.1	2.9	0.7	8.3	3.9	6.4	4.8	3.2	182	1.06	0.33	81.6	13	17	-5	-5	-11	-3	159	116	83	1.7	1.6	0.4	6.4	1.6	5.3	3.9	2.8	76	2.1	0.49	96.3	17	28	-4	-4	-6	-2	6
1	134	1973	42	170	30.0692	86.9	134	95	74	1.2	1.1	0.3	4.3	1.9	4.5	3.2	2.5	50	2.69	0.59	100	19	28	17	17	15	19	135	99	71	2.6	2.6	0.3	12.5	1.4	4.5	3.3	2.4	96	1.41	0.27	88.5	5	13	8	8	5	11	7
1	133	1983	32	174	25.4987	77.2	141	101	77	1	0.8	0.4	3.4	1.3	4.7	3.4	2.6	41	3.44	0.78	100	20	5	8	8	6	9	170	133	80	1.5	1.5	0.2	5.5	0.8	5.7	4.4	2.7	64	2.66	0.59	99.1	17	13	7	7	6	9	6
1	135	1984	31	178	26.5118	84	143	101	80	1.2	1.1	0.4	7	1.4	4.8	3.4	2.7	54	2.67	0.61	98.8	19	21	3	3	2	5	136	99	72	3.6	3.6	0.4	8.1	1.3	4.5	3.3	2.4	135	1.01	0.2	83	3	7	-2	-2	-3	-1	8
1	136	1984	31	182	22.6422	75	161	117	86	1.2	1.2	0.3	4.3	1.1	5.4	3.9	2.9	57	2.84	0.68	100	16	25	-3	-3	-4	-2	192	151	89	3.6	3.5	0.5	7.7	1.8	6.4	5	3	162	1.19	0.28	76.3	1	17	1	1	0	3	8
1	139	1972	43	178	32.1929	102	175	143	74	3.6	3.5	0.4	9.2	1.6	5.8	4.8	2.5	145	1.21	0.26	71.4	5	26	5	5	3	9	242	222	63	2	1.8	0.4	6	1.5	8.1	7.4	2.1	81	2.98	0.66	98.9	30	8	3	3	1	6	6
1	141	1988	27	186	24.4537	84.6	166	124	87	2.3	2.2	0.4	4.8	1.1	5.5	4.1	2.9	102	1.64	0.39	100	7	32	-5	-5	-6	-4	181	142	84	1.2	1.1	0.3	5.1	1.2	6	4.7	2.8	54	3.34	0.81	99.8	24	29	-1	-1	-3	0	5
1	142	1985	30	176	25.3099	78.4	128	91	72	2	1	1.5	3.7	3.8	4.3	3	2.4	90	1.42	0.34	100	22	5	0	1	-5	4	132	96	71	1.2	1	0.5	3	1.6	4.4	3.2	2.4	48	2.74	0.58	100	14	7	3	3	2	5	3
			42.9754
3			40	179	20.3177	65.1	125	91	67	1.9	1.7	0.6	4.6	2.1	4.2	3	2.2	65	1.92	0.35	100	9	11	11	11	10	13	150	118	68	1.3	1.2	0.4	4.4	1.6	5	3.9	2.3	51	2.94	0.62	100	18	18	12	12	11	13	3
3		19-09-1967	50	176	28.6351	88.7	102	77	50	1.3	1.2	0.2	4.4	0.9	3.4	2.6	1.7	35	2.93	0.42	100	12	18	-6	-6	-6	-5	183	149	84	2.4	2.3	0.5	11.8	14.7	6.1	5	2.8	238	0.77	0.4	88.5	7	23	-6	-6	-17	-2	12
3		30-05-1976	41	194	41.0777	154.6	117	95	50	1.5	1.2	0.7	4.2	2.4	3.9	3.2	1.7	55	2.11	0.41	100	18	7	5	5	4	7	217	196	68	1.8	1.6	0.5	7.5	2.1	7.2	6.5	2.3	83	2.62	0.63	95.9	28	25	9	9	7	10	8
3		25-05-1971	46	178	26.7959	84.9	163	130	73	2.7	2.6	0.3	9.1	1.1	5.4	4.3	2.4	99	1.63	0.32	85.5	13	18	-4	-4	-6	-3	208	177	77	2.3	2.1	0.7	8.5	2.1	6.9	5.9	2.6	117	1.77	0.47	89.3	13	15	-1	-2	-3	1	7
3		19-04-1970	47	182	30.3405	100.5	113	87	56	2	1.7	0.8	5.5	2.8	3.8	2.9	1.9	66	1.72	0.31	96.6	6	5	-7	-7	-10	-6	174	151	60	2.5	2.3	0.6	8.7	2.3	5.8	5	2	94	1.86	0.37	92.5	11	13	-6	-6	-9	-5	6
3		08-04-1975	43	187	28.0534	98.1	119	93	56	2.3	2	0.7	5.7	2.2	4	3.1	1.9	71	1.66	0.28	96.5	13	12	-4	-4	-6	-2	231	210	66	2.9	2.7	0.7	10.1	2.5	7.7	7	2.2	131	1.76	0.42	84	21	12	-6	-6	-8	-3	10
3		11-09-1971	46	176	28.2477	87.5	136	108	62	1.2	1	0.5	3.6	1.6	4.5	3.6	2.1	44	3.13	0.63	100	26	13	-10	-10	-11	-9	198	167	80	3.2	2.8	1.3	15.1	6.2	6.6	5.6	2.7	159	1.25	0.33	82.5	17	13	-9	-10	-12	-2	8
3		09-07-1967	50	164	27.4018	73.7	138	101	74	1.4	1.1	0.7	6.8	3.2	4.6	3.4	2.5	71	1.94	0.53	99.5	13	4	5	5	2	7	149	114	73	1.9	1.8	0.3	4.2	1.1	5	3.8	2.4	72	2.06	0.42	100	9	27	5	5	4	6	4
3		06-02-1965	52	176	30.6366	94.9	189	153	81	2.3	2.1	0.5	8.3	2.7	6.3	5.1	2.7	107	1.76	0.44	93.2	25	24	0	0	-2	2	398	367	103	2.8	2.6	0.7	8.6	2.9	13.3	12.2	3.4	208	1.92	0.76	85.8	36	21	2	3	0	4	9
3		23-01-1980	37	175	31.2816	95.8	81	60	43	1.4	1.3	0.4	3.2	1.5	2.7	2	1.4	32	2.58	0.31	100	6	7	-10	-10	-11	-9	105	83	49	1	1	0.2	4	1	3.5	2.8	1.6	29	3.67	0.54	100	10	16	-9	-9	-10	-8	4
3		24-08-1962	55	168	30.4351	85.9	103	76	53	1.3	1.2	0.3	3.8	1	3.4	2.5	1.8	35	2.9	0.42	100	7	8	8	8	7	9	181	157	64	2.2	2.2	0.3	7.8	1	6	5.2	2.1	81	2.25	0.43	93.6	14	24	10	10	9	11	8
3		08-05-1967	50	183	26.0085	87.1	111	80	60	1.4	1.3	0.4	5.1	1.9	3.7	2.7	2	47	2.35	0.42	97.6	7	9	-3	-3	-4	-1	198	171	71	2.7	2.6	0.4	6.4	1.7	6.6	5.7	2.4	110	1.81	0.39	90.5	6	13	-2	-3	-4	-1	6
3		23-03-1972	45	188	22.5498	79.7	123	95	58	1.2	1.1	0.3	4.3	1.6	4.1	3.2	1.9	41	3.01	0.56	100	15	8	2	1	1	3	148	126	56	1.1	1	0.2	3.7	0.9	4.9	4.2	1.9	33	4.53	0.73	100	26	21	0	0	0	1	3
3		09-07-1964	53	176	25.2776	78.3	127	95	66	2.2	2.1	0.3	6.3	1.7	4.2	3.2	2.2	74	1.72	0.31	97.9	5	11	-7	-7	-7	-5	147	116	68	1.7	1.6	0.3	6	1.6	4.9	3.9	2.3	66	2.22	0.46	98	16	18	1	1	0	2	6
3		03-05-1964	53	176	34.8011	107.8	153	131	57	2	1.9	0.3	5.2	1	5.1	4.4	1.9	61	2.5	0.41	99.6	7	14	10	10	9	11	279	254	77	1.7	1.5	0.4	6.9	2.1	9.3	8.5	2.6	99	2.81	0.88	98.4	35	27	7	7	6	8	7
3		18-01-1965	52	194	25.3481	95.4	121	94	57	3	2.9	0.5	11.6	2.6	4	3.1	1.9	89	1.36	0.22	88.1	2	11	-8	-8	-10	-7	147	118	65	2.7	2.5	0.5	10.2	1.9	4.9	3.9	2.2	93	1.57	0.29	88.8	15	15	-6	-6	-7	-5	10
3		14-04-1970	47	186	25.8989	89.6	145	119	61	1.8	1.8	0.2	4.4	0.7	4.8	4	2	58	2.5	0.42	100	12	25	-12	-12	-12	-11	235	210	75	2.7	2.6	0.6	11.3	2.6	7.8	7	2.5	145	1.62	0.46	85.3	15	7	-16	-16	-17	-14	11
3		17-08-1989	28	178	30.6148	97	130	104	59	4.1	4	0.7	9	1.9	4.3	3.5	2	126	1.03	0.17	66.6	1	16	2	2	0	4	239	217	71	3.3	3.2	0.4	8	1.4	8	7.2	2.4	128	1.87	0.39	80	9	32	6	6	4	8	8
3		10-08-1979	38	179	23.3763	74.9	98	68	56	1.5	1.3	0.5	4.2	1.2	3.3	2.3	1.9	44	2.22	0.35	100	7	7	-6	-6	-7	-5	147	124	56	2.2	2.1	0.4	10.1	2.9	4.9	4.1	1.9	83	1.78	0.35	89	17	7	-7	-6	-10	-5	10
3		07-05-1978	39	186	28.8473	99.8	158	117	83	2.3	1.6	1.4	6.7	3.4	5.3	3.9	2.8	121	1.3	0.36	96.5	21	7	8	8	5	10	230	199	82	2.7	2.3	1	10.9	2.9	7.7	6.6	2.7	151	1.52	0.46	89.8	17	15	4	4	1	7	6
3		27-05-1973	44	198	26.5279	104	183	141	88	1.8	1.1	1.3	4.4	3.5	6.1	4.7	2.9	103	1.77	0.53	98.8	21	9	8	8	6	10	463	404	158	3.8	3.2	1.5	12.1	5	15.4	13.5	5.3	434	1.07	0.64	75.8	26	15	2	3	-2	5	12
3		09-03-1961	56	171	25.9225	75.8	128	94	69	1.7	1.6	0.5	4.6	1.8	4.3	3.1	2.3	64	2.02	0.39	100	14	9	-6	-6	-8	-6	140	111	65	1	1	0.3	4.7	1.1	4.7	3.7	2.2	40	3.51	0.71	100	29	20	-6	-6	-7	-5	5
3		01-03-1964	53	175	28.6367	87.7	133	99	69	1.3	1.2	0.4	4.5	1.5	4.4	3.3	2.3	50	2.67	0.54	100	9	29	4	4	3	5	271	240	88	2.5	2.3	0.7	8.9	3.6	9	8	2.9	151	1.8	0.57	94.1	30	25	5	5	2	6	5
3		27-04-1966	51	175	28.0816	86	101	79	48	1.1	1	0.5	2.6	1.3	3.4	2.6	1.6	32	3.13	0.47	100	7	1	8	8	7	9	132	110	52	1.1	1	0.2	4.7	1	4.4	3.7	1.7	31	4.22	0.65	100	14	13	8	8	8	9	5
3		13-09-1967	50	179	31.6782	101.5	85	66	41	1.6	1.5	0.6	5.3	2.3	2.8	2.2	1.4	36	2.37	0.28	96	7	3	-3	-3	-4	-2	110	91	44	1.3	1.2	0.3	4.5	1.2	3.7	3	1.5	33	3.29	0.44	100	14	7	1	1	0	2	4
3		16-01-1974	43	194	26.4109	99.4	148	119	66	1.7	1.5	0.6	4.5	1.9	4.9	4	2.2	63	2.37	0.45	100	12	9	8	8	8	10	300	279	70	2.3	2.2	0.5	10.9	2.7	10	9.3	2.3	138	2.17	0.68	89.6	39	17	5	5	4	7	9
3		09-03-1969	48	187	29.0829	101.7	116	91	54	1.5	1.3	0.6	3.8	2.9	3.9	3	1.8	50	2.34	0.4	100	7	11	-10	-10	-11	-7	193	165	72	2.7	2.5	0.7	8	2.7	6.4	5.5	2.4	117	1.64	0.38	90.3	10	8	-11	-11	-14	-9	8
3		21-02-1964	53	176	34.672	107.4	137	114	56	2.2	2	0.8	5.6	3.2	4.6	3.8	1.9	72	1.91	0.32	98.5	12	9	-19	-19	-20	-16	189	166	64	2.2	1.6	1.3	6.2	4.2	6.3	5.5	2.1	122	1.55	0.45	98.5	19	4	-23	-23	-25	-19	4
3		24-05-1976	41	180	24.1358	78.2	117	89	58	1.6	1.4	0.6	4.4	2.5	3.9	3	1.9	53	2.21	0.39	100	7	5	-1	-1	-4	0	134	106	61	1.6	1.4	0.6	4.5	2.7	4.5	3.5	2	59	2.27	0.44	100	15	9	0	0	-2	2	5
3		20-09-1970	47	173	35.7847	107.1	98	81	41	1.3	1.2	0.4	3.4	1.6	3.3	2.7	1.4	32	3.04	0.39	100	15	8	6	6	4	6	152	135	48	1.9	1.5	0.9	5.6	3.2	5.1	4.5	1.6	82	1.85	0.42	98.9	25	1	6	6	4	9	5
3		28-02-1968	49	180	26.4506	85.7	141	104	74	1.5	1	0.9	5	3.9	4.7	3.5	2.5	69	2.05	0.49	99.9	15	16	6	6	4	8	184	143	88	1.6	1.4	0.6	4.9	2.9	6.1	4.8	2.9	84	2.19	0.6	99.9	24	23	9	9	6	11	5
3		12-07-1973	44	178	26.4802	83.9	104	78	53	1.1	0.8	0.5	2.6	2.1	3.5	2.6	1.8	32	3.25	0.5	100	14	11	0	0	-2	1	118	90	58	1	0.9	0.3	2.7	1.1	3.9	3	1.9	32	3.69	0.62	100	18	28	1	1	0	2	3
3		31-12-1975	42	181	25.0298	82	111	70	69	0.9	0.8	0.3	3.4	1	3.7	2.3	2.3	30	3.75	0.66	100	7	29	0	0	-1	0	157	129	65	1.4	1.3	0.4	6.2	1.5	5.2	4.3	2.2	56	2.81	0.59	99.2	18	19	-2	-2	-3	-1	4
3		30-06-1970	47	181	30.3104	99.3	125	96	63	1.2	1.1	0.3	3.4	1.3	4.2	3.2	2.1	39	3.25	0.57	100	18	31	-16	-16	-17	-15	220	186	86	2.3	2.1	0.6	8	2.1	7.3	6.2	2.9	122	1.81	0.5	96.3	15	29	-6	-6	-8	-5	4
3		07-08-1963	54	168	28.0967	79.3	185	156	71	5.6	4.9	2.6	11.1	6.6	6.2	5.2	2.4	271	0.68	0.17	40.5	1	1	-2	-1	-9	2	249	217	87	3.5	2.9	1.7	9.1	4.5	8.3	7.2	2.9	200	1.24	0.38	75.3	13	3	0	1	-4	3	9
3		16-12-1976	41	180	25.2469	81.8	123	86	69	2.8	2.6	0.7	5.3	2.3	4.1	2.9	2.3	94	1.31	0.24	99	3	9	8	8	5	10	136	105	67	1.3	1.1	0.4	3.4	1.5	4.5	3.5	2.2	46	2.94	0.57	100	17	21	1	1	0	2	3
3		02-10-1968	49	171	27.6666	80.9	145	106	77	1.5	1.3	0.5	5.6	1.6	4.8	3.5	2.6	53	2.74	0.51	98.3	23	28	2	2	1	3	167	128	85	2.8	2.7	0.6	9.6	2.1	5.6	4.3	2.8	111	1.51	0.32	88.8	7	21	4	4	2	6	7
3		14-11-1965	52	169	30.4961	87.1	111	88	51	1	0.9	0.4	2.9	1.2	3.7	2.9	1.7	31	3.56	0.58	100	22	13	5	5	5	6	125	97	59	1.4	1.3	0.3	5	1.7	4.2	3.2	2	51	2.43	0.47	100	11	9	5	5	4	6	3
3		27-02-1964	53	175	26.5469	81.3	103	77	53	2.6	2.3	0.9	5.3	2.5	3.4	2.6	1.8	70	1.47	0.21	95.9	3	3	-3	-3	-5	0	107	85	49	1.7	1.5	0.5	4.9	1.6	3.6	2.8	1.6	47	2.29	0.34	99.8	12	5	3	3	1	4	4
3		22-12-1974	43	172	25.4191	75.2	139	81	95	1.1	0.8	0.5	2.6	2.1	4.6	2.7	3.2	47	2.92	0.68	100	16	31	-10	-10	-11	-9	206	160	102	1.4	1.2	0.4	6.1	2	6.9	5.3	3.4	79	2.62	0.79	99.3	26	55	-9	-9	-10	-8	6
3		02-04-1972	45	180	31.7593	102.9	106	87	46	1.3	1.2	0.3	4.4	1	3.5	2.9	1.5	31	3.48	0.44	100	17	14	-8	-8	-9	-7	142	116	63	1.5	1.3	0.5	4.5	1.9	4.7	3.9	2.1	50	2.81	0.51	100	18	20	-10	-10	-11	-9	4
3		26-03-1969	48	180	29.6296	96	110	85	52	1.9	1.8	0.4	7.8	1.2	3.7	2.8	1.7	54	2.02	0.31	95.6	9	9	-4	-4	-5	-3	298	272	79	1.9	1.8	0.4	21.2	2	9.9	9.1	2.6	112	2.65	0.82	93.7	39	26	-1	-1	-2	1	21
3		16-01-1974	43	176	23.0178	71.3	122	89	67	1.5	1.5	0.3	4.3	1.3	4.1	3	2.2	54	2.25	0.42	100	7	28	4	4	3	5	152	119	72	2.3	2.2	0.6	7.4	1.8	5.1	4	2.4	93	1.63	0.35	89.6	8	10	3	3	2	4	7
3		12-04-1966	51	185	25.9459	88.8	121	93	58	1.2	1	0.5	4.4	1.6	4	3.1	1.9	43	2.85	0.53	100	22	11	1	1	0	2	167	143	62	1.5	1.4	0.3	5.4	1.2	5.6	4.8	2.1	56	2.98	0.58	99.2	28	23	5	5	4	6	4
3		27-09-1964	53	190	25.4571	91.9	151	126	59	1.8	1.2	1.1	5.4	3.4	5	4.2	2	87	1.74	0.45	99.6	20	3	3	4	0	6	198	175	64	1.5	1.3	0.5	5	2.1	6.6	5.8	2.1	76	2.62	0.69	99.6	26	15	0	0	-2	1	5
3			29	175	89.9	29.3551	176	142	77	1.3	1.2	0.3	5.6	1.9	5.9	4.7	2.6	62	2.83	0.74	99.6	25	26	-4	-5	-5	-1	191	161	73	1.7	1.6	0.3	4	1	6.4	5.4	2.4	68	2.8	0.6	100	25	26	-3	-3	-4	-2	4
3			39	176	85.3	27.5374	119	80	70	2.1	1.9	0.6	4.7	2.1	4	2.7	2.3	75	1.6	0.31	100	9	12	3	3	1	4	172	139	76	2	1.9	0.3	6.7	1.7	5.7	4.6	2.5	85	2.03	0.47	94.8	25	25	6	5	4	7	7
3			32	178	78.3	24.7128	131	103	60	0.9	0.8	0.2	4.4	1.7	4.4	3.4	2	35	3.7	0.77	100	26	15	14	14	13	14	158	128	68	1.5	1.5	0.3	8.4	1	5.3	4.3	2.3	57	2.76	0.55	95.3	20	31	12	12	12	13	4
3			33	179	88.5	27.6209	110	85	53	1.8	1.7	0.3	8.1	1	3.7	2.8	1.8	51	2.15	0.33	95.3	10	21	9	9	8	10	135	105	64	2.1	1.8	0.8	5.5	3.3	4.5	3.5	2.1	87	1.56	0.34	95.9	13	7	14	14	11	16	5
3			32	189	101.8	28.4986	125	100	55	1.4	1.3	0.4	5.3	1.4	4.2	3.3	1.8	46	2.71	0.46	99.5	17	13	2	2	1	5	223	204	61	2.1	2	0.4	9.6	2	7.4	6.8	2	82	2.74	0.56	92.8	23	16	0	0	-1	3	5
3			40	164	62.2	23.1261	146	113	70	3	2.9	0.5	8.4	1.4	4.9	3.8	2.3	108	1.36	0.26	81.5	7	9	-7	-7	-10	-6	149	115	72	1.6	1.4	0.6	7.6	1.9	5	3.8	2.4	61	2.47	0.51	98.5	15	5	-4	-3	-6	-2	4
3			50	166	83.1	30.1568	154	104	93	2.8	1.6	2.1	5.5	6.5	5.1	3.5	3.1	145	1.06	0.29	94.5	7	3	0	0	-6	5	792	709	266	5.8	4.7	2.6	19.2	18.5	26.4	23.6	8.9	1088	0.73	0.73	54.3	48	29	-1	0	-18	5	16
3			47	158	64.3	25.7571	136	98	75	2.8	2.8	0.4	6.8	1.4	4.5	3.3	2.5	107	1.27	0.26	90.5	3	15	-11	-11	-13	-9	183	142	88	2.3	2	0.8	5.9	2.9	6.1	4.7	2.9	116	1.57	0.43	96.1	13	15	-10	-10	-13	-8	5
3			55	164	70	26.0262	136	109	61	1.7	1.5	0.8	5.2	2	4.5	3.6	2	63	2.17	0.41	98.9	17	3	-1	-1	-4	2	133	108	57	1.3	1.2	0.3	3.6	0.8	4.4	3.6	1.9	40	3.31	0.55	100	18	16	-4	-4	-6	-3	4
3			50	158	61.2	24.5153	125	85	73	1.2	0.7	0.8	2	2.5	4.2	2.8	2.4	47	2.63	0.57	100	17	5	-4	-5	-6	-2	167	131	77	1	0.8	0.4	3.6	2	5.6	4.4	2.6	50	3.31	0.91	100	34	11	1	1	0	3	3
3			51	160	58.6	22.8906	134	89	82	3.4	3.3	0.9	9.6	2.9	4.5	3	2.7	141	0.95	0.21	79.3	1	11	1	1	0	3	158	107	93	3.5	2.9	1.5	8.4	4.5	5.3	3.6	3.1	177	0.89	0.24	73.5	9	11	1	1	-2	5	8
3			50	176	87.1	28.1185	158	126	72	3.3	2.8	1.2	11.8	4.3	5.3	4.2	2.4	160	0.99	0.26	85.9	6	11	39	39	35	43	312	282	94	3.6	3.3	1.1	10.3	3.7	10.4	9.4	3.1	224	1.39	0.45	74.5	22	19	47	48	43	51	10
3			50	163	62.7	23.5989	151	111	79	2.2	2	0.5	8.8	1.8	5	3.7	2.6	90	1.69	0.37	98.2	11	14	6	6	4	7	195	167	74	2.9	2.7	1	11	2.3	6.5	5.6	2.5	133	1.47	0.35	83.2	14	5	4	4	2	7	7
3			32	165	54		124	92	64	0.7	0.7	0.2	2.4	0.8	4.1	3.1	2.1	26	4.85	0.9	100	20	23	8	8	7	9	294	266	84	2.7	2.6	0.4	8.5	2	9.8	8.9	2.8	133	2.21	0.58	90.2	22	30	8	8	6	10	8
3			34	176	77		142	97	83	1.9	1.7	0.4	8	2.7	4.7	3.2	2.8	81	1.75	0.4	95.8	13	29	1	2	-3	3	126	94	65	1.7	1.6	0.3	5	1	4.2	3.1	2.2	53	2.37	0.41	100	6	25	-1	-1	-2	0	5
3			64	164	74		93	62	56	0.6	0.5	0.3	2.3	0.8	3.1	2.1	1.9	18	5.26	0.81	100	13	25	-4	-4	-4	-3	110	82	56	1.5	1.4	0.5	3.8	1.3	3.7	2.7	1.9	44	2.48	0.38	100	12	3	-4	-4	-6	-3	4
3			22	183	73		131	89	77	0.6	0.6	0.2	2.1	0.8	4.4	3	2.6	24	5.43	1.12	100	17	31	-1	-1	-1	0	219	176	97	3.6	3.5	0.3	13.9	1.3	7.3	5.9	3.2	182	1.21	0.32	68.9	20	41	-1	-1	-2	1	14
3			21	181	84		128	98	63	0.9	0.7	0.4	3.3	1.4	4.3	3.3	2.1	34	3.77	0.74	100	17	7	3	3	2	4	195	161	82	1.4	1.1	0.6	4.1	3	6.5	5.4	2.7	82	2.38	0.76	100	21	7	3	3	1	4	4
3			21	161	53		123	87	67	1.5	1.1	0.9	3.4	3	4.1	2.9	2.2	59	2.09	0.43	100	19	7	-2	-2	-5	1	189	153	79	1.8	1.7	0.5	6.1	2.4	6.3	5.1	2.6	78	2.41	0.55	99.2	24	20	3	3	1	5	5
3			28	175	74		96	76	43	1.9	1.4	1	3.5	2.9	3.2	2.5	1.4	56	1.7	0.27	100	13	3	10	10	8	13	164	146	51	4.1	3.6	1.6	14.6	3.5	5.5	4.9	1.7	143	1.15	0.21	69	1	3	3	3	-1	6	15
[truncated: 83 more columns]

## Sheet: Arkusz2
		WIEK	WYSOKOŚĆ	MASA	BMI	#REF!	SP-EO [mm]	SPAP-EO [mm]	SPML-EO [mm]	MA-EO [mm]	MAAP-EO [mm]	MAML-EO [mm]	MaxAP-EO [mm]	MaxML-EO [mm]	MV-EO [mm/s]	MVAP-EO [mm/s]	MVML-EO [mm/s]	SA-EO [mm^2]	SPSA-EO [1/dmm]	MF-EO [Hz]	TR-EO R=5mm [%]	LWAP-EO	LWML-EO	MNDB-EO	MDDB-EO	MinDB-EO	MaxDB-EO	SP-EO-L [mm]	SPAP-EO-L [mm]	SPML-EO-L [mm]	MA-EO-L [mm]	MAAP-EO-L [mm]	MAML-EO-L [mm]	MaxAP-EO-L [mm]	MaxML-EO-L [mm]	MV-EO-L [mm/s]	MVAP-EO-L [mm/s]	MVML-EO-L [mm/s]	SA-EO-L [mm^2]	SPSA-EO-L [1/dmm]	MF-EO-L [Hz]	TR-EO-L R=5mm [%]	LWAP-EO-L	LWML-EO-L	SP-EO-P [mm]	SPAP-EO-P [mm]	SPML-EO-P [mm]	MA-EO-P [mm]	MAAP-EO-P [mm]
2		59	186		38.2414	2	106	91	38	1.8	1.6	0.4	8.6	1.4	3.5	3	1.3	46	2.31	0.31	97.5	13	5	8	8	6	9	95	82	35	1.7	1.6	0.3	8	1.4	3.2	2.7	1.2	32	2.97	0.31	97.8	7	13	130	115	49	1.9	1.8
2		42	175		29.3551	2	176	142	77	1.3	1.2	0.3	5.6	1.9	5.9	4.7	2.6	62	2.83	0.74	99.6	25	26	-4	-5	-5	-1	166	137	75	1.5	1.4	0.4	6.9	3	5.5	4.6	2.5	49	3.35	0.59	99.4	21	17	206	175	91	1.4	1.1
2		39	176		27.5374	2	119	80	70	2.1	1.9	0.6	4.7	2.1	4	2.7	2.3	75	1.6	0.31	100	9	12	3	3	1	4	97	70	54	2.1	2	0.4	6	2	3.2	2.3	1.8	55	1.76	0.25	90	5	1	143	117	62	2.1	1.9
2		32	178		24.7128	2	131	103	60	0.9	0.8	0.2	4.4	1.7	4.4	3.4	2	35	3.7	0.77	100	26	15	14	14	13	14	144	122	59	1.2	1.1	0.4	4.9	1.9	4.8	4.1	2	37	3.92	0.64	99.7	24	12	136	109	61	0.8	0.8
2		33	179		27.6209	2	110	85	53	1.8	1.7	0.3	8.1	1	3.7	2.8	1.8	51	2.15	0.33	95.3	10	21	9	9	8	10	104	85	45	1.7	1.6	0.4	7.6	2	3.5	2.8	1.5	37	2.84	0.33	95.2	8	7	130	106	60	2	1.8
2		32	189		28.4986	2	125	100	55	1.4	1.3	0.4	5.3	1.4	4.2	3.3	1.8	46	2.71	0.46	99.5	17	13	2	2	1	5	145	130	47	1.8	1.7	0.4	6.9	1.2	4.8	4.3	1.6	41	3.54	0.43	98.5	11	5	111	92	50	1.7	1.4
2		63	158		22.2721	2	161	109	96	2.1	1.6	1	6.4	3.3	5.4	3.6	3.2	105	1.54	0.41	94.8	13	9	1	0	-1	3	170	129	83	1.6	1.5	0.5	5.7	2.1	5.7	4.3	2.8	70	2.42	0.57	96.2	17	11	159	122	78	2.2	1.8
2		40	164		23.1261	2	146	113	70	3	2.9	0.5	8.4	1.4	4.9	3.8	2.3	108	1.36	0.26	81.5	7	9	-7	-7	-10	-6	155	119	77	4.3	4.1	1.2	10.6	3.7	5.2	4	2.6	156	0.99	0.19	64.6	3	3	163	137	68	2.2	2.1
2		57	182		24.8158	2	186	159	68	3.3	2.5	1.7	8.8	3.4	6.2	5.3	2.3	184	1.01	0.3	90.8	13	3	14	14	10	17	172	151	58	3.1	3	0.5	6.7	1.7	5.7	5	1.9	91	1.9	0.3	89.3	9	3	223	194	88	3.6	3.3
2		50	166		30.1568	2	154	104	93	2.8	1.6	2.1	5.5	6.5	5.1	3.5	3.1	145	1.06	0.29	94.5	7	3	0	0	-6	5	154	123	68	1.6	1.5	0.3	5.8	1.2	5.1	4.1	2.3	54	2.85	0.52	96.9	16	10	165	135	73	2.4	2.1
2		60	161		25.5777	2	267	178	166	3.3	2.6	1.4	12.5	8.3	8.9	5.9	5.5	313	0.85	0.43	84	18	35	5	5	-3	8	242	197	109	2.5	2.3	1	8.9	3.4	8.1	6.6	3.6	129	1.87	0.51	92	16	14	274	202	161	3.7	3.2
2		60	161		27.198	2	238	192	106	7	5.6	3.4	16.3	8.6	7.9	6.4	3.5	528	0.45	0.18	32	7	5	-4	-4	-15	5	181	142	89	3	2.6	1.2	8.4	4.3	6	4.7	3	123	1.47	0.32	81.3	11	9	312	261	151	9.7	8.7
2		63	162		23.7388	2	214	156	112	5.2	4.9	1	11.8	5	7.1	5.2	3.7	304	0.7	0.22	52.1	8	23	3	3	0	6	301	273	91	8.4	8.3	1.3	20.7	4.1	10	9.1	3	403	0.75	0.19	35.2	10	8	136	91	82	2.4	2
2		59	164		32.9417	2	133	93	75	1.8	1.6	0.6	4.4	1.9	4.4	3.1	2.5	68	1.96	0.4	100	13	13	-1	-1	-3	0	139	102	73	2.5	2.4	0.7	5.8	2.2	4.6	3.4	2.4	82	1.7	0.29	95.4	7	5	134	108	64	1.3	1.1
2		57	156		25.8876	2	144	108	73	2.2	2	0.5	7.8	1.9	4.8	3.6	2.4	88	1.64	0.35	94.6	9	14	-4	-4	-6	-1	207	174	88	3.2	3	0.9	12.1	3.7	6.9	5.8	2.9	115	1.81	0.35	85.9	11	11	119	90	62	1.2	1.1
2		57	170		27.8893	2	172	136	76	3	2.6	1	7.7	3.7	5.7	4.5	2.5	141	1.22	0.31	90	14	14	4	4	2	7	210	186	73	3.9	3.7	1	12.8	3.5	7	6.2	2.4	129	1.63	0.29	71.6	10	6	130	105	59	1.6	1.5
2		59	170		29.2734	2	135	106	64	3.6	3.4	0.9	8.3	2.5	4.5	3.5	2.1	132	1.02	0.2	77	3	7	-4	-4	-7	-2	165	143	58	3.9	3.9	0.3	10.2	1.1	5.5	4.8	1.9	116	1.42	0.23	65.5	5	8	116	93	55	3.4	3.1
2		47	158		25.7571	2	136	98	75	2.8	2.8	0.4	6.8	1.4	4.5	3.3	2.5	107	1.27	0.26	90.5	3	15	-11	-11	-13	-9	172	137	80	2.2	2.1	0.3	5.1	1	5.7	4.6	2.7	82	2.1	0.42	99.2	3	9	140	104	75	3.5	3
2		55	164		26.0262	2	136	109	61	1.7	1.5	0.8	5.2	2	4.5	3.6	2	63	2.17	0.41	98.9	17	3	-1	-1	-4	2	141	111	68	1.3	1.2	0.3	4.2	1.1	4.7	3.7	2.3	45	3.17	0.57	100	20	15	158	126	77	1.8	1.6
2		50	158		24.5153	2	125	85	73	1.2	0.7	0.8	2	2.5	4.2	2.8	2.4	47	2.63	0.57	100	17	5	-4	-5	-6	-2	155	122	73	0.9	0.9	0.1	3.3	0.5	5.2	4.1	2.4	33	4.75	0.94	100	21	7	115	85	59	0.7	0.7
2		51	160		22.8906	2	134	89	82	3.4	3.3	0.9	9.6	2.9	4.5	3	2.7	141	0.95	0.21	79.3	1	11	1	1	0	3	138	104	71	3.2	3.1	0.4	10.4	1.8	4.6	3.5	2.4	115	1.2	0.23	81.3	1	7	146	114	69	3.6	3.4
2		56	152		25.4934	2	118	74	76	1.3	1.2	0.3	3.3	1.6	3.9	2.5	2.5	48	2.44	0.5	100	7	18	-1	-1	-3	0	134	100	70	1.5	1.4	0.3	4.4	1.1	4.5	3.3	2.3	52	2.6	0.48	100	7	5	124	88	69	1	0.9
2		50	176		28.1185	2	158	126	72	3.3	2.8	1.2	11.8	4.3	5.3	4.2	2.4	160	0.99	0.26	85.9	6	11	39	39	35	43	173	159	50	3.8	3.7	0.6	14.7	2.2	5.8	5.3	1.7	107	1.63	0.24	77.1	6	7	157	114	86	1.3	1.3
2		50	163		23.5989	2	151	111	79	2.2	2	0.5	8.8	1.8	5	3.7	2.6	90	1.69	0.37	98.2	11	14	6	6	4	7	145	113	71	1.6	1.6	0.3	6.1	1.2	4.8	3.8	2.4	57	2.55	0.47	99.5	11	13	177	147	73	2.9	2.7
2		34	176		24.858	2	142	97	83	1.9	1.7	0.4	8	2.7	4.7	3.2	2.8	81	1.75	0.4	95.8	13	29	1	2	-3	3	149	125	62	1.7	1.6	0.4	6.6	1.9	5	4.2	2.1	67	2.22	0.46	97.8	7	7	131	109	57	2.2	2
2		22	183		21.7982	2	131	89	77	0.6	0.6	0.2	2.1	0.8	4.4	3	2.6	24	5.43	1.12	100	17	31	-1	-1	-1	0	160	125	76	0.8	0.8	0.3	2.4	0.9	5.3	4.2	2.5	32	4.92	1.02	100	17	9	148	116	71	0.7	0.6
2		21	181		25.6402	2	128	98	63	0.9	0.7	0.4	3.3	1.4	4.3	3.3	2.1	34	3.77	0.74	100	17	7	3	3	2	4	135	107	65	1	0.9	0.5	3.5	2	4.5	3.6	2.2	31	4.39	0.71	100	11	7	150	120	74	0.8	0.7
2		28	175		24.1633	2	96	76	43	1.9	1.4	1	3.5	2.9	3.2	2.5	1.4	56	1.7	0.27	100	13	3	10	10	8	13	110	93	44	2.3	2.1	0.9	5.6	2.1	3.7	3.1	1.5	45	2.45	0.26	94.3	13	1	96	77	43	1	1
2		35	185		26.8809	2	128	102	58	2.7	2.1	1.2	7.3	3.7	4.3	3.4	1.9	100	1.27	0.25	89	13	7	1	1	-1	5	119	99	49	1.7	1.6	0.4	5.1	1.1	4	3.3	1.6	38	3.11	0.38	99.4	10	6	153	133	60	3.3	3
2		42	188		23.4835	2	168	142	64	1.6	1.4	0.6	5.5	2.5	5.6	4.7	2.1	64	2.61	0.57	99.2	20	9	-1	-1	-5	1
2		40	176		24.5351	2	188	150	84	3.7	3.5	0.7	8.8	2.6	6.3	5	2.8	167	1.13	0.27	76.4	7	12	1	1	-3	3
2		49	178		24.6181	2	234	206	77	2.6	2.4	0.8	11.5	4	7.8	6.9	2.6	140	1.67	0.47	91.4	19	13	-7	-7	-10	-1
2		28	185		24.8356	2	138	107	67	2	1.9	0.5	5	1.6	4.6	3.6	2.2	75	1.84	0.36	100	5	21	-5	-5	-7	-4
				132.3
				89.9
				85.3
				78.3
				88.5
				101.8
				55.6
				62.2
				82.2
				83.1
				66.3
				70.5
				62.3
				88.6
				63
				80.6
				84.6
				64.3
				70
				61.2
				58.6
				58.9
				87.1
				62.7
				77
				73
				84
				74
				92
				83
				76
				78
				85
[truncated: 94 more columns]
